# Supplementary material
Source: PubMed Central journal article supplement (PMC8595505)
Supplement: NIHMS1723314-supplement-supinfo.pdf [file NIHMS1723314-supplement-supinfo.pdf]

SUPPLEMENTAL FILES FOR REVIEW AND ONLINE PUBLICATION

Supplemental Table 1. Spearman's  $\rho$  or group mean differences between demographic and health characteristics with SEL slope.

| Characteristic                                               | Spearman's $\rho$<br>or group mean<br>differences<br>(standard<br>error) with<br>SEL slope | <i>p</i> -value |
|--------------------------------------------------------------|--------------------------------------------------------------------------------------------|-----------------|
| Self-reported energy (Y2)                                    | .02                                                                                        | .34             |
| Self-reported energy slope (annual change in points.)        | --                                                                                         | --              |
| Mobility Disability, <i>n</i> (%) yes                        | -.03 (.002)                                                                                | <.001           |
| Mortality, <i>n</i> (%) yes                                  | -.01 (.002)                                                                                | <.001           |
| <b>Demographics</b>                                          |                                                                                            |                 |
| White race                                                   | -.01 (.003)                                                                                | <.001           |
| Women                                                        | .001 (.002)                                                                                | .80             |
| Age (Y2)                                                     | -.07                                                                                       | .001            |
| Education                                                    |                                                                                            |                 |
| Less than high school                                        | .01 (.003)                                                                                 | .05             |
| High school                                                  | -.002 (.003)                                                                               | .42             |
| Postsecondary (Ref)                                          |                                                                                            |                 |
| <b>Health-related factors</b>                                |                                                                                            |                 |
| Comorbid health conditions (# of health conditions, Y2)      | -.08                                                                                       | .001            |
| Comorbidity slope (annual change in # of conditions)         | -.05                                                                                       | .01             |
| Ankle-arm index (Y1)                                         | .02                                                                                        | .39             |
| <b>Behavioral-related factors</b>                            |                                                                                            |                 |
| Smoking history (Y2), <i>n</i> (%) ever yes                  | -.004 (.002)                                                                               | .13             |
| BMI (Y2)                                                     | -.02                                                                                       | .39             |
| Self-reported tiredness (Y2), <i>n</i> (%) yes               | -.01 (.003)                                                                                | .02             |
| Teng 3MS (Y1)                                                | -.05                                                                                       | .04             |
| Teng 3MS slope (annual change in pts.)                       | -.001                                                                                      | .95             |
| Digit Symbol Substitution Test (Y1)                          | -.04                                                                                       | .11             |
| Digit Symbol Substitution Test slope (annual change in pts.) | .11                                                                                        | <.001           |
| CES-D (Y1)                                                   | -.07                                                                                       | .002            |
| CES-D slope (annual change in pts.)                          | -.21                                                                                       | <.001           |
| <b>Physical performance</b>                                  |                                                                                            |                 |
| Usual gait speed (Y2)                                        | .07                                                                                        | .003            |
| Usual gait speed slope (annual change in m/s)                | .22                                                                                        | <.001           |
| Rapid gait speed (Y2)                                        | .08                                                                                        | .001            |
| Rapid gait speed slope (annual change in m/s)                | .22                                                                                        | <.001           |

|                                                  |            |       |
|--------------------------------------------------|------------|-------|
| Weekly walking and exercise (Y2), (kcal/kg/week) | .006       | .80   |
| Weekly walking and exercise slope                | -.09       | <.001 |
| Appetite (Y2), <i>n</i> (%) good appetite        | .01 (.005) | .09   |
| Sleep Quality (Y2)                               | -.03       | .17   |

Note. Self-reported energy levels (SEL) slope reflects the unadjusted slope from baseline until death or study completion. Y = year of data collection (e.g., Y2 = Year 2); M = mean; SD = standard deviation; BMI = body mass index; Teng 3MS = Teng Modified Mini-Mental State Examination; CES-D = Center of Epidemiological Studies-Depression scale; kCal = kilocalories; kg = kilograms.

Supplemental Table 2. Parsimonious Cox regression model of energy predicting incident mobility disability and mortality.

|                                         | Hazard Ratio (95% CI)   | p-value |
|-----------------------------------------|-------------------------|---------|
| <b>Incident mobility disability</b>     |                         |         |
| SEL slope                               | 0.65 (0.55, 0.76)       | <.001   |
| Baseline energy                         | 0.92 (0.88, 0.97)       | .001    |
| Ankle-arm Index                         | 0.51 (0.34, 0.78)       | .002    |
| BMI                                     | 1.04 (1.02, 1.06)       | <.001   |
| Baseline comorbidities                  | 1.13 (1.05, 1.23)       | .002    |
| Baseline tiredness                      | 1.19 (1.00, 1.42)       | .05     |
| Baseline CES-D                          | 1.03 (1.01, 1.04)       | .001    |
| CES-D slope                             | 1.36 (1.00, 1.84)       | .05     |
| Baseline usual gait speed               | 0.17 (0.11, 0.25)       | <.001   |
| Usual gait speed slope                  | <0.01 (<0.01, 0.03)     | .005    |
| Rapid gait speed slope                  | <0.01 (<0.01, <0.01)    | <.001   |
| Weekly walking & exercise slope         | 11.32 (4.81, 26.69)     | <.001   |
| <b>Incident mortality</b>               |                         |         |
| SEL slope                               | 0.67 (0.52, 0.87)       | .003    |
| Baseline SEL                            | 0.93 (0.87, 0.99)       | .02     |
| Men                                     | 1.31 (3.03, 1.65)       | .02     |
| Baseline Digit Symbol Substitution Task | 0.98 (0.97, 0.99)       | <.001   |
| Usual gait speed slope                  | <0.001 (<0.001, <0.001) | <.001   |
| Mobility disability prior to death      | 0.74 (0.58, 0.95)       | .02     |

Note. Self-reported energy levels (SEL) slope is scaled to reflect a one-unit increase across the full eight-year period, or an annual increase of .125 points. CI = confidence interval, BMI = body mass index, CES-D = Center for Epidemiologic Studies-Depression Scale.
